1 **Detection of velogenic avian paramyxoviruses in rock doves in New York City,**  
2 **New York**

3  
4 **Authors**

5 Isabel Francisco<sup>1,2</sup>, Shatoni Bailey<sup>1,3,#</sup>, Teresa Bautista<sup>1,4,#</sup>, Djenabou Diallo<sup>1,3,#</sup>, Jesus  
6 Gonzalez<sup>1,3,#</sup>, Joel Gonzalez<sup>1,3,#</sup>, Ericka Kirkpatrick Roubidoux<sup>5</sup>, Paul K. Ajayi<sup>1</sup>, Randy  
7 A. Albrecht<sup>2,6</sup>, Rita McMahon<sup>7\*</sup>, Florian Krammer<sup>1,2,8\*</sup>, and Christine Marizzi<sup>1\*</sup>

8  
9 <sup>1</sup>New York City Virus Hunters Program, BioBus, New York, NY 10027, USA

10 <sup>2</sup>Department of Microbiology, Icahn School of Medicine at Mount Sinai, New York, NY 10029,  
11 USA

12 <sup>3</sup>Central Park East High School, New York City Department of Education, New York, NY 10028,  
13 USA

14 <sup>4</sup>High School for Environmental Studies, New York City Department of Education, New York, NY  
15 10019, USA

16 <sup>5</sup>Department of Infectious Diseases, St. Jude Children's Research Hospital, Memphis, TN 38105,  
17 USA

18 <sup>6</sup>The Global Health and Emerging Pathogens Institute, Icahn School of Medicine at Mount Sinai,  
19 New York, NY 10029, USA

20 <sup>7</sup>Wild Bird Fund, New York, NY 10024, USA

21 <sup>8</sup>Department of Pathology, Molecular and Cell Based Medicine Icahn School of Medicine at Mount  
22 Sinai, New York, NY 10029, USA

23  
24 #contributed equally

25 \*corresponding author

26

27 **Abstract**

28 Avian paramyxovirus 1 (APMV-1), also known as Newcastle disease virus (NDV), causes  
29 severe and economically important disease in poultry around the globe. Although a limited  
30 amount of APMV-1 strains in urban areas have been characterized, the role of the urban  
31 wild bird population as an APMV-1 reservoir is unclear. Since urban birds may have an  
32 important role for long-term circulation of the virus, fecal and swab samples were  
33 collected by community scientists from wild birds in New York City (NYC), New York,  
34 United States. These samples were screened for APMV-1 and genotypically  
35 characterized by sequencing of the complete genome. A total of 885 samples were  
36 collected from NYC parks and from a local wildlife rehabilitation clinic from October 2020  
37 through June 2021. Eight birds (1.1 %) screened positive for the APMV-1 nucleoprotein  
38 gene by conventional reverse transcription polymerase chain reaction (RT-PCR), and two  
39 live viruses were isolated via egg culture. The F protein cleavage site, an indicator of  
40 pathogenicity, was present in the two samples fully sequenced by next generation  
41 sequencing, and positioned <sup>112</sup>R R K K R F<sup>117</sup>. Phylogenetic analysis of the F gene coding  
42 sequence classified both isolates into genotype VI, a diverse and predominant genotype  
43 responsible for NDV outbreaks in pigeon and dove species worldwide.

44

45 **Importance:**

46 Here we describe the first large-scale effort to screen for APMV-1 in New York City's wild  
47 bird population as part of the New York City Virus Hunters program, a community science  
48 initiative. We have characterized two isolates of NDV, with phylogenetic analyses

49 suggesting diversity in established and circulating strains of pigeon paramyxoviruses. Our  
50 isolates are also domestic reference strains for future APMV-1 vaccine developments.  
51 Future surveillance in this region may contribute to our understanding of NDV's evolution  
52 and genetic diversity, as well as inform poultry husbandry and vaccination practices in  
53 New York State.

54

55 Keywords: birds, urban viral surveillance, avian paramyxovirus 1 (APMV-1), Newcastle  
56 Disease Virus (NDV), wildlife, community science, citizen science.

## 57 Introduction

58

59 Avian Paramyxovirus 1 (APMV-1), also known as Newcastle Disease Virus (NDV),  
60 is an economically important poultry pathogen, with occasional outbreaks reported in wild  
61 birds (1, 2). As a causative agent of virulent Newcastle disease (ND), it often causes  
62 neurological symptoms in birds, including but not limited to twisting of the head and neck,  
63 poor balance, tremors, and paralysis of wings and legs (2). Although NDV can be  
64 controlled through vaccination and maintaining strict biosecurity measures, it still poses  
65 a high economic burden on the poultry industry (3-5). Chickens have been reported as  
66 highly susceptible, as well as gallinaceous birds such as turkey, quail, and guinea. The  
67 2003 NDV outbreak in the western United States alone resulted in the death or culling of  
68 over 3 million birds (6-9). Distributed around the globe, NDV is an Office International des  
69 Epizooties (OIE) notifiable disease and prompt reporting of any outbreak is mandatory to  
70 local regulatory agencies (9, 10). In the United States, a sporadic form of the disease  
71 exists throughout the year, and only a limited number of outbreaks are officially reported  
72 annually to the United States Department of Agriculture (USDA) (9). Most recent  
73 outbreaks confirmed by the USDA include more than 470 premises in California, including  
74 4 commercial premises in 2020 (9).

75 APMV-1 is a member of the genus *Avulavirus* within the family *Paramyxoviridae*,  
76 order *Mononegavirales* (11). The enveloped genome of this single-stranded negative  
77 sense RNA virus is approximately 15.2 kb in length and encodes for 6 different proteins,  
78 i.e. nucleocapsid protein (NP), phosphoprotein (P), fusion protein (F), matrix protein (M),  
79 hemagglutinin-neuraminidase (HN), and the RNA polymerase (L) protein (11). The NP  
80 protein forms the nucleocapsid core with genomic RNA, to which P and L proteins are  
81 bound (12). The non-glycosylated M protein is located beneath the envelope and  
82 associated with virus assembly and budding (12). The two surface glycoproteins HN and  
83 F are responsible for binding to host cell sialic acid receptors (HN) and for fusion of the  
84 viral envelope to the host cell membrane (F) (13). As a property of the family, APMV-1  
85 carries high protein coding capacity, which is further enhanced by RNA editing, resulting  
86 in generation of the two non-structural proteins V and W during the transcription of the P  
87 gene (13, 14). While the V protein is a key regulator of cell apoptosis and viral replication  
88 (14), very little is known about the W protein (15).

89 Several NDV molecular classification systems have been developed in order to  
90 document and track this virus's genetic diversity and evolution. Unified phylogenetic  
91 classification criteria were established by the OIE, separating all existing NDV isolates  
92 into two classes (class I and class II) and as many as twenty-one genotypes, as described  
93 by Dimitrov et al (16). This collaborative effort also suggests updated guidelines for

94 nomenclature, especially for sub-genotypes, as the worldwide circulation and evolution  
95 of NDV will continue to lead to the emergence of new NDV variants.

96 On the basis of conventional *in vivo* pathogenicity indices for poultry, APMV-1  
97 strains are classified into several pathotypes. Viscerotropic velogenic APMV-1 is highly  
98 pathogenic and causes intestinal infection with high mortality in birds, whereas  
99 neurotropic velogenic APMV-1 is responsible for symptoms of the respiratory and nervous  
100 systems with high mortality. The mesogenic strains are less pathogenic, often with acute  
101 respiratory and nervous symptoms but with relatively low mortality. The lentogenic strains  
102 of APMV-1 cause mild respiratory tract infections, allowing for a prolonged virus  
103 replication and shedding (9, 10). This wide range in pathogenicity has been attributed to  
104 differences in the F protein cleavage site (10). While all mesogenic and velogenic APMV-  
105 1 strains carry an amino acid sequence of <sup>112</sup>R/K-R-Q-R/K-R-F<sup>117</sup> within the F protein,  
106 lentogenic strains are characterized by <sup>112</sup>G/E-K/R-Q-G/E-R-L<sup>117</sup> (10).

107 While no treatment for NDV infection is known, it can be controlled by the use of  
108 vaccines, and several prophylactic NDV vaccines are available on the national and  
109 international market for use in commercial poultry (10). Live attenuated NDV vaccines  
110 are suitable for mass production and utilized for routine mass vaccination via spray or  
111 drinking water. [17]. Despite the extensive and unrestricted use of vaccines to prevent  
112 NDV in domestic poultry in the United States, APMV-1 still remains one of the main poultry  
113 diseases in both commercial and backyard chickens (9). This might be explained by the  
114 mismatch between field and vaccine strains and emergence of novel APMV-1 strains by  
115 divergence of sub-genotypes circulating in vaccinated poultry. Dimitrov *et al.* reported in  
116 2016 that vaccine strains currently used are three to seven decades old, and up to 26.6%  
117 genetically distant (nucleotide distance) from virulent contemporary NDV strains (3, 17).

118 Moreover, similar to rural wild birds, the role of wild urban birds in the epizootiology  
119 of APMV-1 has remained understudied and therefore unclear. Wild birds represent major  
120 natural reservoirs and are potential dispersers of infectious disease, including pathogens  
121 like APMV-1 and avian influenza virus. Densely populated urban areas and city parks are  
122 unique habitats for wild birds, where species in the order of *Anseriformes* (e.g. ducks,  
123 geese and swans) and *Charadriiformes* (e.g. shorebirds and gulls) are more likely to  
124 come into contact with other bird species. Virulent strains of APMV-1 are often maintained  
125 in wild birds in close proximity to water such as cormorants and gulls. Strains from class  
126 II genotype VI of APMV-1, sometimes called pigeon paramyxovirus 1 (PPMV-1), are also  
127 believed to be endemic in locations with large populations of *Columbiformes* or pigeons  
128 and doves (18), species ubiquitous to New York City. To date, there has been no spillover  
129 outbreak from *Columbiformes* species into poultry documented in the US, though the role  
130 of wild birds in the transmission of virulent NDV is not fully understood (19, 20).

131 In North America, millions of wild birds migrate along one of the four north-south  
132 flyways annually - the Atlantic, Mississippi, Central, and Pacific (21). Along the Atlantic  
133 flyway, there are many key sites that migratory birds utilize to gather to breed, feed, or  
134 rest. With major metropolitan areas such as Massachusetts and New York along the  
135 route, it is also the flyway most densely populated by humans. Migratory birds resting in  
136 urban areas may be particularly important in the transmission pathway among  
137 immunologically naïve birds, because once infected, they may shed virus particles for  
138 weeks through fecal and respiratory droppings, and without showing any clinical

139 symptoms. No avian surveillance has established what viruses circulate endemically in  
140 the migratory species located in New York City.

141 Here, we report results from the first large-scale surveillance investigation on  
142 APMV-1 in wild birds performed in the New York City metropolitan area. Launched in  
143 2020, New York City Virus Hunters is a community science program that is based on  
144 community participation. A collaboration between BioBus, a Science Outreach  
145 organization; the Krammer Laboratory at the Icahn School of Medicine at Mount Sinai, an  
146 influenza research laboratory; and the Wild Bird Fund (WBF), an urban wildlife  
147 rehabilitation clinic, this study aims to address the lack of extensive baseline data for  
148 avian viruses in wild birds in urban areas. In order to evaluate the degree of genetic  
149 diversity of APMV-1 strains circulating in NYC's wild bird populations and to estimate the  
150 relationships to APMV-1 strains that circulated in the Northeast region in the past, the  
151 complete genomes of two APMVs isolated from NYC birds were characterized  
152 phylogenetically. Finally, this program also addresses the lack of participatory research  
153 opportunities for the local community to help to prepare for and prevent the next  
154 pandemic.

155 Participatory research, sometimes termed citizen science or community science,  
156 has become an important data source in many scientific disciplines (22, 23). In contrast  
157 to other projects where participants partake in only data collection, the New York City  
158 Virus Hunters program invited participants to be actively involved in every step of the  
159 research process. New York City residents engaged in study design and outreach  
160 strategies, followed by trained and supervised sample collection, processing and  
161 analysis, as well as data dissemination tailored to the scientific community and the  
162 general public. This closed-feedback loop ensures that program participants take the data  
163 they generate directly to their communities, potentially improving awareness about  
164 infectious disease, pandemic preparedness and in long-term vaccination rates among the  
165 least-vaccinated and therefore vulnerable populations.

## 166 167 **Materials and Methods**

### 168 169 *Study sites and sample collection*

170  
171 New York City Parks and natural areas were sampled for wild bird fecal samples  
172 from October 2020 through June 2021, including seven parks in Manhattan, Brooklyn,  
173 and the Bronx (**Figure 1**). Visited parks were Central Park, Fort Tryon Park, George  
174 Washington Park and Carl Schurz Park in Manhattan; Van Cortlandt Park in the Bronx;  
175 and Prospect Park in Brooklyn. Fecal samples were collected using sterilized  
176 microcentrifuge tubes and cotton swabs. Samples were taken at least 10 feet apart and  
177 fresh or visibly moist samples were preferentially selected. Fecal samples were  
178 transported on ice and kept at -80 °C until processing.

179 Wild birds surrendered to the WBF in Manhattan, NY for rehabilitation were  
180 opportunistically sampled from January through June 2021. Fresh fecal samples ( $\leq 12$   
181 hours) were collected from individual clinic enclosures to sample live birds in  
182 rehabilitation. Cloacal and oropharyngeal swabs were also collected from recently  
183 deceased or euthanized birds using sterile flocked nylon-tipped swabs. Swab tips were  
184 placed in conical tubes containing either MicroTest viral transport medium (Thermo



185 Scientific, USA) or medium containing 50% phosphate buffered saline and 50% glycerol,  
186 supplemented with 1% Gibco™ Antibiotic-Antimycotic 100X (Thermo Scientific, USA)).  
187 Fecal samples and swab tips were kept in a 4 °C freezer for pickup and then transferred  
188 to -80 °C within 48 hours of collection. All live bird sampling was performed or supervised  
189 by New York State licensed wildlife rehabilitators employed by the WBF.

190

#### 191 *RNA extraction and RT-PCR*

192

193 Fecal samples were diluted in phosphate-buffered saline, pH 7.4 (1X, Thermo  
194 Scientific, USA) for processing. Suspended fecal samples and swab samples were  
195 centrifuged at 4,000 x g for 15 min and viral RNA was extracted from each supernatant  
196 using the QIAamp Viral RNA Mini Kit (Qiagen, USA). Conventional RT-PCR was  
197 performed using the Invitrogen™ SuperScript™ IV First-Strand Synthesis System  
198 (Thermo Scientific, USA) for cDNA synthesis and DreamTaq Green PCR Master Mix (2X)  
199 (Thermo Scientific, USA) for RT-PCR, using previously described primers for APMV-1  
200 surveillance that target the nucleoprotein (NP) gene (**Table 1**). cDNA was synthesized at  
201 55 °C for 10 min. Cycling conditions for APMV-1 PCR consisted of a pre-denaturation step  
202 at 95 °C for 1 min, followed by 40 cycles of denaturation at 95 °C for 1 min, annealing at  
203 50 °C for 30 sec, and extension at 72 °C for 30 sec, with a final extension step at 72 °C for  
204 5 min. PCR amplicons were visualized with SYBR Safe™ DNA Gel Stain in 2% Ultra Pure  
205 Agarose (Thermo Scientific, USA). DNA bands were excised and purified using the  
206 QIAquick Gel Extraction Kit (Qiagen, USA) and sent for commercial Sanger Sequencing  
207 through Genewiz® to verify the identity of samples that screened positive. Samples were  
208 also screened for avian influenza virus, with results appearing elsewhere.

209

#### 210 *Signal amplification and sequencing*

211

212 Supernatants for samples that screened positive on PCR were inoculated into the  
213 allantoic cavity of 10-11-day-old embryonated specific-pathogen-free chicken eggs and  
214 incubated at 37 °C for 48 hours to amplify the signal detected in the initial samples.  
215 Allantoic fluid from incubated eggs was harvested and centrifuged at 4,000 x g for 15 min.  
216 Presence of virus was then determined by a hemagglutination assay using chicken red  
217 blood cells and standard methods. Viral RNA was extracted from virus-infected allantoic  
218 fluid and conventional RT-PCR was used to confirm the presence of APMV-1 as  
219 described above.

220 For isolated APMV-1, primer sets were designed for this study in order to obtain  
221 the full coding sequence of the fusion (F) gene for APMV-1. Primers were synthesized by  
222 Thermo Scientific, USA. Conventional RT-PCR and commercial Sanger sequencing were  
223 performed using these primer sets as described above. All infectious materials were  
224 maintained in Biosafety Level 2+ containment at the Icahn School of Medicine, Mount  
225 Sinai. Any sample with an F-gene containing a polybasic cleavage site (indicative of non-  
226 lentogenic NDV) was immediately reported to the USDA and transferred to a BSL3+  
227 select agent facility for storage.

228 RNA from two confirmed APMV-1 cases was also submitted for Next Generation  
229 Sequencing (NGS) through Genewiz®. Sequence reads were trimmed to remove possible  
230 adapter sequences and nucleotides with poor quality using Trimmomatic v.0.36. The

231 trimmed reads generated were aligned in STAR aligner v.2.5.2b to a closely related North  
232 American pigeon paramyxovirus reference genome in GenBank with accession number  
233 KP780874.2. Consensus sequences were generated from the alignment files in the  
234 software Geneious V.2021.1.1 (Biomatters, Inc., New Zealand). These consensus  
235 sequences were also verified using V-pipe, a bioinformatics pipeline designed for the  
236 analysis of NGS data from RNA viruses (24).

237

### 238 *Phylogenetic analysis*

239

240 F gene coding sequences for the two APMV-1 isolates were compared with the  
241 online NIH GenBank database using BLASTN. Genotype and sub-genotype classification  
242 were performed according to criteria for the updated unified phylogenetic classification  
243 for NDV as described by Dimitrov *et al* (16). Alignments were performed using the  
244 ClustalW program and visualized in MEGA X. Phylogenetic trees were created and  
245 visualized in MEGA X using the Maximum Likelihood (ML) method and the Tamura-Nei  
246 model. Evolutionary distances between groups were inferred utilizing the Maximum  
247 Composite Likelihood model with rate variation among sites modeled with a gamma  
248 distribution (shape parameter = 1). Full genome sequence alignments with a  
249 representative reference genome were performed with Clustal Omega at EMBL-EBI using  
250 default settings (25-27).

251

## 252 **Results**

253

### 254 *Sampling and virus detection*

255

256 A total of 885 birds were sampled from October 2020 to June 2021. 74 fecal  
257 samples from three NYC Parks, 65 fecal samples from the Wild Bird Fund, and 116 swab  
258 samples (58 oropharyngeal and 58 cloacal) from the WBF were screened for APMV-1 by  
259 RT-PCR (N=255) (**Figure 1**). All WBF samples were from birds rescued in NYC and  
260 admitted to the site, which is located in Manhattan (**Figure 1**). 36 of the 74 fecal samples  
261 collected in parks (48.6%) were from Canada geese (*Branta canadensis*), while 136 of  
262 the 197 birds sampled at the WBF (69.0%) were rock doves (*Columba livia*).

263

264 Of the 255 samples processed, the avian paramyxovirus-1 nucleoprotein (NP)  
265 gene was detected in swab samples from eight birds (4.1%) spanning three NYC  
266 boroughs (**Table 2**). Seven of the APMV-1-positive birds were pigeon species and one  
267 was an American woodcock (*Scolopax minor*, **Table 2**). Of the samples positive on RT-  
268 PCR, two APMV-1 viruses were isolated via chicken egg inoculation, both positive on HA  
269 assay after the first egg passage.

269

### 270 *Sequencing*

271

272 The full F gene coding sequences for both isolated APMV-1 viruses were obtained  
273 via Sanger sequencing. Both sequences are 1659 bp in length and encode a predicted F  
274 protein of 553 amino acids. Both isolates also presented fusion protein cleavage sites  
275 compatible with virulent Newcastle Disease virus (NDV), with five basic amino acids at  
276 positions 112-116 and a phenylalanine residue at position 117 (<sup>112</sup>R R K K R F<sup>117</sup>) (10).

277 Both isolates were reported to the USDA as *APMV-1/Rock\_Dove/NYC/USA/NYCVH/21-*  
278 *0109/2021* and *APMV-1/Rock\_Dove/NYC/USA/NYCVH/21-0052/2021*. In accordance  
279 with federal regulations, the detection of virulent NDV was reported to the USDA and all  
280 raw sample materials for both birds were moved to a select agent biosafety level 3 facility  
281 within the Icahn School of Medicine at Mount Sinai.

282 The complete genome sequences of both APMV-1 isolates were obtained by  
283 commercial Next Generation Sequencing (NGS) from extracted RNA ( $\geq 100,000$  fold  
284 coverage). Both isolates had an expected consensus genome sequence length of 15,192  
285 nucleotides. Comparison of the F gene sequences for both viruses with the sequences  
286 previously obtained via RT-PCR confirmed the presence of a virulent cleavage site at the  
287 F protein (**Figure 2**). The F protein coding sequence for one isolate, 21-0052, contained  
288 one difference in nucleotide, at position 5822, when compared with the complete genome  
289 obtained by NGS sequencing. The nucleotide and amino acid in question as indicated by  
290 the NGS data were identical to our reference sequences. The NGS sequence was used  
291 for further analysis of this isolate as well as the other isolate (21-0109), which was 100%  
292 identical to its Sanger sequence.

### 293 294 *Clinical features*

295  
296 45 of the 123 (36.6%) birds sampled at the WBF were documented to have  
297 neurologic symptoms while at the clinic, with a likely diagnosis (i.e. lead toxicity, head  
298 trauma) for 12 of these cases (26.7%). Of the eight birds that screened positive on RT-  
299 PCR for APMV-1, four (50%) presented with neurologic clinical signs without a likely  
300 diagnosis, including head tremors, torticollis, ataxia, paresis and paralysis (**Table 2**). Of  
301 the two birds with live APMV-1 isolated, one (21-0052) presented with generalized  
302 weakness and confusion; the other (21-0109) had no neurologic signs. Both birds were  
303 rock doves that presented to the WBF in January 2021 for generalized weakness and  
304 inability to fly, declined over time, and died in early February 2021.

### 305 306 *Phylogenetic analysis*

307  
308 Phylogenetic analysis of the two F gene coding sequences indicated that they  
309 belong to Class II, genotype VI, subgenotype VI.2.1.1.1, using the representative dataset  
310 for Class II NDV from the recently updated and unified NDV classification system (**Figure**  
311 **3**) (16). The pairwise nucleotide distance between the F gene coding sequences for the  
312 two isolates was calculated to be 2.4%, meeting the criteria for the same subgenotype  
313 ( $\leq 5\%$  difference).

314 Nucleotide BLAST analysis of the F gene coding sequences for 21-0109 and 21-  
315 0052 showed close similarity to other NDV strains isolated from pigeons in the US in  
316 GenBank. Sixty-five F gene coding sequences were selected for further phylogenetic  
317 analysis, excluding sequences from earlier than 2007 (**Figure 4**). The evolutionary  
318 distances between our isolates, these selected sequences, and other genotype VI viruses  
319 in the consortium dataset were estimated and are included in table form in the  
320 supplemental materials (**Supplemental table S1**) (N=76). The average nucleotide  
321 distance between these sequences was 3.5%.

322 Based on F gene coding sequences, the two isolates from this current study were  
323 most closely related to sub-genotype VI.2.1.1.1 sequences from Maryland (MD),  
324 Pennsylvania (PA) and Michigan (MI) from 2013, as well as sequences from  
325 Massachusetts (MA) and PA from 2014 and 2012, respectively. They were therefore more  
326 closely related to PPMV's from other states than to each other. The two isolates  
327 expectedly grouped together with these closely related sequences (**Figure 4**). Our  
328 isolates also grouped together with NDV sequences from PA, New Jersey (NJ), MD,  
329 Minnesota (MN) and Missouri (MO) that were in the same subgenotype, while NDV  
330 sequences from Kansas (KS), Texas (TX), and Utah (UT) were grouped together in a  
331 separate subgenotype (**Figure 4**).

332

### 333 *Data Availability*

334

335 The obtained complete genome sequences of *APMV-*  
336 *1/Rock\_Dove/NYC/USA/NYCVH/21-0109/2021* and *APMV-*  
337 *1/Rock\_Dove/NYC/USA/NYCVH/21-0052/2021* were submitted to NCBI NIH GenBank  
338 and are available under accession numbers XXXX to XXXX.

339

### 340 **Discussion and Outlook**

341

342 The present study demonstrates the role of community science as a sentinel for  
343 urban viral surveillance initiatives that potentially could detect emerging infectious  
344 disease. A similar strategy of conducting surveillance on wild birds in urban spaces would  
345 be useful for other regions located along major flyways. Monitoring of those viruses that  
346 have the potential to infect a wide range of birds, and in some cases humans, could serve  
347 as an early warning system. Because local residents are engaged from the beginning of  
348 the project to the communication of scientific findings, this model also has potential to  
349 raise scientific literacy among community members, in particular increasing their  
350 understanding of infectious disease and environmental health information specific to an  
351 urban area.

352 We found that none of our fecal samples screened positive for APMV-1. Fecal  
353 samples for this study were collected whenever available, and nucleic acids may have  
354 degraded depending on how much time had passed since the animal defecated. Further  
355 sample collection efforts could make a more explicit effort to collect fresh (i.e. still moist)  
356 samples only.

357 The two viruses that were isolated from rock dove swab samples in January to  
358 March 2021 were classified as class II APMV-1 viruses of sub-genotype VI.2.1.1.1.  
359 Whether the detection of this sub-genotype reflects a dominance of this virus within urban  
360 rock doves is highly speculative, since no other genetic data for APMV-1 in New York is  
361 available. However, it is notable that there was a 2.4% percent divergence between the  
362 F gene coding sequences of these two isolates, both isolated from rock doves rescued in  
363 Manhattan, NY. This suggests that the two infections were not related but acquired  
364 independently by the two birds. It also suggests the presence of significant diversity in  
365 established and circulating strains of NDV in New York City pigeons, as well as frequent,  
366 common infection in wild birds.



367 Although both of our isolates contained a polybasic cleavage site in their F protein  
368 (**Figure 2**), a molecular indicator of virulence, it is notable that neurologic clinical signs  
369 were observed in only 50% of the birds that tested positive for APMV-1 on PCR. Possible  
370 explanations include the presence of variably neurotropic strains of NDV infecting the  
371 pigeon population, or variable immune response and severity of clinical signs in a bird  
372 population adapted to this virus. Either hypothesis indicates frequent infection of wild rock  
373 doves by NDV strains in New York City.

374 This study found bird swab samples that tested positive for APMV-1 across  
375 Manhattan, Brooklyn, and Queens (**Figure 1**), suggesting widespread geographic  
376 distribution of NDV across the New York City metro area. Phylogenetic characterization  
377 of our two APMV-1 isolates suggests that they are closely related to viruses isolated  
378 between 2012 and 2014 in neighboring Atlantic Flyway states: MD, PA, MI and MA. As  
379 expected, our isolates were less closely related to PPMV-1 isolates from Midwestern  
380 states along the Central Flyway, such as Kansas and Texas. Highly adapted to urban  
381 areas with increased, dense human activity, rock doves are not migratory, but have the  
382 ability to fly great distances of up to 1800 kilometers if displaced from their homes (28,  
383 29). As a major stop along a migratory flyway, New York City's urban and natural areas  
384 alike provide many opportunities for wild birds to forage together and otherwise interact.  
385 Therefore, the possibility that the sub-genotypes described here originated outside of  
386 New York City and were introduced through migratory, infected birds shedding those  
387 viruses cannot be excluded.

388 These findings indicate a need for more intensive surveillance in this region,  
389 specifically for APMV-1 but also for avian diseases generally. If circulating strains of NDV  
390 frequently infect NYC pigeons, and if the most closely related documented sequences in  
391 the Northeast date back to 2013 (**Figure 4**), future study of this population can contribute  
392 to our understanding of NDV's evolution and genetic diversity. NDV surveillance can also  
393 inform routine husbandry and vaccination programs for backyard and commercial poultry  
394 in NY state. Finally, New York City live poultry markets and licensed small  
395 slaughterhouses should be encouraged to follow NYC Department of Health and NY  
396 State Department of Agriculture public health guidance at all times, especially when  
397 disease is detected in their flocks.

398 It is important to note that APMV-1 infections in humans are rare and typically  
399 cause no symptoms in humans. If symptoms occur, they are mild and self-limited  
400 influenza-like symptoms or conjunctivitis that clear up quickly with no treatment required.  
401 In fact, the lentogenic NDV vaccine strain LaSota has been proven to be safe in humans,  
402 and is used as an oncolytic agent and a vaccine vector (30-34). Although no evidence to  
403 support human-to-human transmission exists, the potential for human-to-bird  
404 transmission cannot be excluded, especially in immunocompromised individuals or those  
405 working closely with live poultry. Employers and occupational health professionals at the  
406 human-animal interface should be educated on biosafety as well as best practices around  
407 zoonotic disease transmission specific to their area of work. In the future, close monitoring  
408 of wild birds in urban settings will be essential to protecting animal and ecological safety,  
409 promoting the healthy development of poultry farming, and preventing and controlling any  
410 large-scale outbreaks of Newcastle disease virus. Community Scientists such as the New  
411 York City Virus Hunters are untapped drivers to fill in knowledge gaps for research

412 advancement in infectious disease surveillance and communication of public health  
413 practices to the public

414

#### 415 **Conflict of Interest**

416

417 All authors declare that they have no conflict of interest regarding the publication of this  
418 article. The funder had no role in study design, data collection and analysis, decision to  
419 publish, or preparation of the manuscript.

420

#### 421 **Acknowledgements**

422

423 This research was supported by FluLab (<https://theflulab.org/about>). We thank Brady  
424 Simmons of New York City Parks and Recreation for her support in obtaining sampling  
425 permits. We thank Maya Sasao and Clara Arndtsen of the Wild Bird Fund for assistance  
426 in handling wild birds. We also gratefully acknowledge Meagan McMahon, Philip Meade,  
427 and Irene Hoxie for helpful discussions around study design and data analysis.

428

#### 429 **Author Contributions**

430

431 I.F., S.B., T.B, D.D., J.G., J.G., P.K.A, F.K, R.M. and C.M. contributed to overall  
432 surveillance design. I.F., S.B., T.B., D.D., J.G., J.G. and C.M. designed and performed  
433 field data collection and laboratory analysis for the surveillance samples. I.F., C.M., E.R.  
434 and F.K. analyzed the data and drafted the manuscript. R.A. handled reporting to the  
435 USDA and BSL3 sample management. All authors reviewed the manuscript and provided  
436 critical feedback.

437

438

439

440  
441

**Table 1. Primer set used for APMV-1 virus detection by RT-PCR**

| <b>Application</b> | <b>Target Gene</b> | <b>Primer</b> | <b>Sequences (5' - 3')</b> | <b>Reference</b>          |
|--------------------|--------------------|---------------|----------------------------|---------------------------|
| APMV-1 RT-PCR      | Nucleoprotein (NP) | NDV2429       | GAACACAGCATATCATGGAC       | Ferreira et al. 2019 (35) |
|                    |                    | NDV2587       | CTCCATCATAGACATCATCGC      |                           |

442

Table 1. APMV-1 = avian paramyxovirus-1, RT-PCR = reverse-transcription polymerase chain reaction

443

444

445 **Table 2. Clinical and sampling information for wild birds positive on RT-PCR for**  
 446 **avian paramyxovirus-1 (APMV-1) in New York City from October 2020 to June**  
 447 **2021.**  
 448

| Sample ID | Sample Type      | Species (Common Name) | Location <sup>a</sup>                    | Sampling Date | APMV-1 RT-PCR | Neurologic signs <sup>b</sup>        | Virus Isolation for signal amplification |
|-----------|------------------|-----------------------|------------------------------------------|---------------|---------------|--------------------------------------|------------------------------------------|
| 21-0109   | OP swab          | rock dove             | East 71 <sup>st</sup> St, Manhattan, NY  | 2/5/2021      | +             | none                                 | yes                                      |
| 21-0052   | OP swab, CL swab | rock dove             | West 33rd St and Broadway, Manhattan, NY | 1/27/2021     | +             | confusion                            | yes                                      |
| 21-0490   | OP swab, CL swab | rock dove             | Manhattan, NY                            | 3/24/2021     | +             | none                                 | no                                       |
| 21-0550   | OP swab          | rock dove             | Unknown                                  | 2/23/2021     | +             | torticollis, head tremors            | no                                       |
| 21-0593   | OP swab, CL swab | rock dove             | Van Kleeck St, Elmhurst, Queens, NY      | 2/23/2021     | +             | ataxia, hindlimb paresis, depression | no                                       |
| 21-0693   | OP swab, CL swab | rock dove             | Newkirk Plaza, Flatbush, Brooklyn, NY    | 3/3/2021      | +             | head tremors, hindlimb paralysis     | no                                       |
| 21-0710   | OP swab, CL swab | American woodcock     | Clay St, Greenpoint, Brooklyn, NY        | 3/5/2021      | +             | none                                 | no                                       |
| 21-0705   | OP swab, CL swab | rock dove             | West 58th St and 6th Ave, Manhattan, NY  | 3/5/2021      | +             | N/A (dead on arrival)                | no                                       |

449 Table 2. OP = oropharyngeal; CL = cloacal; <sup>a</sup>Location = sampling location for fecal samples in NYC parks  
 450 OR rescue location for live birds at Wild Bird Fund; <sup>b</sup>Neurologic signs are listed as recorded by the Wild  
 451 Bird Fund  
 452



453 **Figure 1: Sampling location of birds that confirmed positive for APMV in New**  
454 **York City by RT-PCR targeting the fusion (F) gene.** Six samples that screened  
455 positive for APMV are indicated in blue. Two samples with additionally available full  
456 length genomic APMV sequences are indicated in red. Two samples where no further  
457 location than New York City was available (samples 3 and 4), are mapped to the  
458 location of the intake site (Wild Bird Fund).  
459 1: 21-0109: East 71st Street, Manhattan, New York, NY  
460 2: 21-0052: West 33rd and Broadway, Manhattan, New York, NY  
461 3,4: 21-0490 and 21-0550: Manhattan, New York, NY  
462 5: 21-0705: West 58<sup>th</sup> Street and 6<sup>th</sup> Avenue, Manhattan, New York, NY  
463 6: 21-0693: Newkirk Plaza, Flatbush, Brooklyn, NY  
464 7: 21-0710: Clay Street, Greenpoint, Brooklyn, NY  
465 8: 21-0593: Van Kleeck Street, Elmhurst, Queens, NY  
466 Airports: North East: LGA South East: JFK West: EWR, major parks and natural  
467 areas are indicated in green, top sampling location for each borough labeled (Central  
468 Park in Manhattan, NY; Prospect Park in Brooklyn, NY and Van Cortlandt Park in the  
469 Bronx, NY). Location approximate. Bird icon not to scale. Graph prepared by  
470 Christine Marizzi, based on  
471 [https://commons.wikimedia.org/wiki/File:Waterways\\_New\\_York\\_City\\_Map\\_Julius\\_Schorzman.png](https://commons.wikimedia.org/wiki/File:Waterways_New_York_City_Map_Julius_Schorzman.png);  
472 CC-BY-SA-2.5

473  
474 **Figure 2. Characterization of F protein virulence determination site of isolates by**  
475 **comparison to a representative sequence of APMV-1.** Single amino acid  
476 polymorphisms between the two novel APMV-1 isolates identified in this study are  
477 highlighted in blue. The typical RRKRR polybasic cleavage site motif is highlighted (red  
478 rectangle). Alignment was prepared with Clustal Omega at EMBL-EBI using default  
479 settings.

480  
481 **Figure 3. Phylogenetic tree of isolates with representative Class II NDV F protein**  
482 **sequences.** Evolutionary analysis by Maximum Likelihood method and Tamura-Nei  
483 model. Tree includes the two APMV-1 isolates from this study and 125 representative F  
484 gene coding sequences from Class II NDV from the pilot dataset for genotype  
485 classification by Dimitrov *et al* (16) (N=127). The scale bar represents the percent  
486 divergence or nucleotide difference between sequences. The tree with the highest log  
487 likelihood (-31439.35) is shown. Initial tree(s) for the heuristic search were obtained  
488 automatically by applying Neighbor-Join and BioNJ algorithms to a matrix of pairwise  
489 distances estimated using the Tamura-Nei model, and then selecting the topology with  
490 superior log likelihood value. The tree is drawn to scale, with branch lengths measured  
491 in the number of substitutions per site. This analysis involved 127 nucleotide  
492 sequences. Codon positions included were 1st+2nd+3rd+Noncoding. There were a total  
493 of 1662 positions in the final dataset. Evolutionary analyses were conducted in MEGA  
494 X.

495  
496 **Figure 4. Phylogenetic tree of isolates with closely related NDV F protein**  
497 **sequences.** Evolutionary analysis by Maximum Likelihood method and Tamura-  
498 Nei model. Tree includes F gene coding sequences from the two APMV-1 isolates from

499 this study, 9 representative Class II Genotype VI NDV sequences from the pilot dataset  
500 by Dimitrov *et al.* (16), and 65 closely related NDV strains from wild birds in the USA.  
501 The scale bar represents the percent divergence or nucleotide difference between  
502 sequences. The tree with the highest log likelihood (-8126.65) is shown. Initial tree(s) for  
503 the heuristic search were obtained automatically by applying Neighbor-Join and BioNJ  
504 algorithms to a matrix of pairwise distances estimated using the Tamura-Nei model, and  
505 then selecting the topology with superior log likelihood value. The tree is drawn to scale,  
506 with branch lengths measured in the number of substitutions per site. This analysis  
507 involved 76 nucleotide sequences. Codon positions included were  
508 1<sup>st</sup>+2<sup>nd</sup>+3<sup>rd</sup>+Noncoding. Positions containing gaps and missing data were eliminated.  
509 There were a total of 1656 positions in the final dataset. Evolutionary analyses were  
510 conducted in MEGA X.

511 **Supplemental Table S1. Estimates of evolutionary divergence between isolates**  
512 **and closely related NDV F protein sequences.** The nucleotide distances between  
513 sequences are shown. Analyses were conducted using the Maximum Composite  
514 Likelihood model. This analysis involved 76 nucleotide sequences. Codon positions  
515 included were 1<sup>st</sup>+2<sup>nd</sup>+3<sup>rd</sup>+Noncoding. All ambiguous positions were removed for each  
516 sequence pair (pairwise deletion option). There were a total of 1656 positions.

517

## 518 **References**

519

- 520 1. Ganar K, Das M, Sinha S, Kumar S. Newcastle disease virus: current status and our  
521 understanding. *Virus Res.* 2014;184:71-81. Epub 2014/03/05. doi:  
522 10.1016/j.virusres.2014.02.016. PubMed PMID: 24589707; PubMed Central PMCID:  
523 PMC7127793.
- 524 2. Miller PJ, Koch G. Newcastle disease. In: Swayne DE, Glisson JR, McDougald LR,  
525 Nolan LK, Suarez DL, Nair VL, editors. *Diseases of Poultry*. 13th ed. Ames, Iowa: John Wiley  
526 & Sons; 2013. p. p. 89-107; 20-30.
- 527 3. Dimitrov KM, Afonso CL, Yu Q, Miller PJ. Newcastle disease vaccines-A solved  
528 problem or a continuous challenge? *Vet Microbiol.* 2017;206:126-36. Epub 2016/12/28. doi:  
529 10.1016/j.vetmic.2016.12.019. PubMed PMID: 28024856; PubMed Central PMCID:  
530 PMC7131810.
- 531 4. Ferreira HL, Reilley AM, Goldenberg D, Ortiz IRA, Gallardo RA, Suarez DL. Protection  
532 conferred by commercial NDV live attenuated and double recombinant HVT vaccines against  
533 virulent California 2018 Newcastle disease virus (NDV) in chickens. *Vaccine.*  
534 2020;38(34):5507-15. Epub 2020/06/28. doi: 10.1016/j.vaccine.2020.06.004. PubMed PMID:  
535 32591288.
- 536 5. Alexander DJ. Gordon Memorial Lecture. Newcastle disease. *Br Poult Sci.* 2001;42(1):5-  
537 22. Epub 2001/05/08. doi: 10.1080/713655022. PubMed PMID: 11337967.
- 538 6. Pedersen JC, Senne DA, Woolcock PR, Kinde H, King DJ, Wise MG, et al. Phylogenetic  
539 Relationships among Virulent Newcastle Disease Virus Isolates from the 2002-2003 Outbreak in  
540 California and Other Recent Outbreaks in North America. *Journal of Clinical Microbiology.*  
541 2004;42(5):2329-34. doi: doi:10.1128/JCM.42.5.2329-2334.2004.
- 542 7. Brown VR, Bevins SN. A review of virulent Newcastle disease viruses in the United  
543 States and the role of wild birds in viral persistence and spread. *Vet Res.* 2017;48(1):68. Epub

- 544 2017/10/28. doi: 10.1186/s13567-017-0475-9. PubMed PMID: 29073919; PubMed Central  
545 PMCID: PMC5659000.
- 546 8. Jindal N, Chander Y, Chockalingam AK, de Abin M, Redig PT, Goyal SM. Phylogenetic  
547 analysis of Newcastle disease viruses isolated from waterfowl in the upper midwest region of the  
548 United States. *Virol J.* 2009;6:191. Epub 2009/11/07. doi: 10.1186/1743-422X-6-191. PubMed  
549 PMID: 19891788; PubMed Central PMCID: PMC2776597.
- 550 9. Service UDoAAaPHI. Virulent Newcastle Disease (vND) 2021 [updated March 31,  
551 2021]. Available from: [https://www.aphis.usda.gov/aphis/ourfocus/animalhealth/animal-disease-](https://www.aphis.usda.gov/aphis/ourfocus/animalhealth/animal-disease-information/avian/virulent-newcastle/vnd)  
552 [information/avian/virulent-newcastle/vnd](https://www.aphis.usda.gov/aphis/ourfocus/animalhealth/animal-disease-information/avian/virulent-newcastle/vnd).
- 553 10. Swayne DE, Brown IH. Newcastle disease (infection with Newcastle disease virus). In:  
554 OIE, editor. *Manual of Diagnostic Tests and Vaccines for Terrestrial Animals 2021*. 2021. 2021.  
555 11. Lamb RA, Parks GD. Paramyxoviridae: the viruses and their replication. In: Fields BN,  
556 Knipe DM, Howley PM, editors. *Fields Virology: Sixth Edition*. 1: Lippincott, Williams, and  
557 Wilkins; 2013. p. 957-95.
- 558 12. Pantua HD, McGinnes LW, Peeples ME, Morrison TG. Requirements for the assembly  
559 and release of Newcastle disease virus-like particles. *J Virol.* 2006;80(22):11062-73. Epub  
560 2006/09/15. doi: 10.1128/JVI.00726-06. PubMed PMID: 16971425; PubMed Central PMCID:  
561 PMC1642154.
- 562 13. Steward M, Vipond IB, Millar NS, Emmerson PT. RNA editing in Newcastle disease  
563 virus. *J Gen Virol.* 1993;74 ( Pt 12):2539-47. Epub 1993/12/01. doi: 10.1099/0022-1317-74-12-  
564 2539. PubMed PMID: 8277263.
- 565 14. Chu Z, Wang C, Tang Q, Shi X, Gao X, Ma J, et al. Newcastle Disease Virus V Protein  
566 Inhibits Cell Apoptosis and Promotes Viral Replication by Targeting CacyBP/SIP. *Front Cell*  
567 *Infect Microbiol.* 2018;8:304. Epub 2018/09/21. doi: 10.3389/fcimb.2018.00304. PubMed  
568 PMID: 30234028; PubMed Central PMCID: PMC6130229.
- 569 15. Yang Y, Xue J, Teng Q, Li X, Bu Y, Zhang G. Mechanisms and consequences of  
570 Newcastle disease virus W protein subcellular localization in the nucleus or mitochondria. *J*  
571 *Virol.* 2021. Epub 2021/01/15. doi: 10.1128/JVI.02087-20. PubMed PMID: 33441338; PubMed  
572 Central PMCID: PMC8092705.
- 573 16. Dimitrov KM, Abolnik C, Afonso CL, Albina E, Bahl J, Berg M, et al. Updated unified  
574 phylogenetic classification system and revised nomenclature for Newcastle disease virus. *Infect*  
575 *Genet Evol.* 2019;74:103917. Epub 2019/06/15. doi: 10.1016/j.meegid.2019.103917. PubMed  
576 PMID: 31200111; PubMed Central PMCID: PMC6876278.
- 577 17. Dimitrov KM, Ramey AM, Qiu X, Bahl J, Afonso CL. Temporal, geographic, and host  
578 distribution of avian paramyxovirus 1 (Newcastle disease virus). *Infect Genet Evol.* 2016;39:22-  
579 34. Epub 2016/01/23. doi: 10.1016/j.meegid.2016.01.008. PubMed PMID: 26792710.
- 580 18. Kim LM, King DJ, Guzman H, Tesh RB, Rosa APATd, Bueno R, et al. Biological and  
581 Phylogenetic Characterization of Pigeon Paramyxovirus Serotype 1 Circulating in Wild North  
582 American Pigeons and Doves. *Journal of Clinical Microbiology.* 2008;46(10):3303-10. doi:  
583 doi:10.1128/JCM.00644-08.
- 584 19. Hines NL, Miller CL. Avian paramyxovirus serotype-1: a review of disease distribution,  
585 clinical symptoms, and laboratory diagnostics. *Vet Med Int.* 2012;2012:708216. Epub  
586 2012/05/12. doi: 10.1155/2012/708216. PubMed PMID: 22577610; PubMed Central PMCID:  
587 PMC3345259.
- 588 20. Snoeck CJ, Adeyanju AT, Owoade AA, Couacy-Hymann E, Alkali BR, Ottosson U, et al.  
589 Genetic diversity of newcastle disease virus in wild birds and pigeons in West Africa. *Appl*

- 590 Environ Microbiol. 2013;79(24):7867-74. Epub 2013/10/15. doi: 10.1128/AEM.02716-13.  
591 PubMed PMID: 24123735; PubMed Central PMCID: PMCPMC3837833.
- 592 21. Buhnerkempe MG, Webb CT, Merton AA, Buhnerkempe JE, Givens GH, Miller RS, et  
593 al. Identification of migratory bird flyways in North America using community detection on  
594 biological networks. *Ecol Appl*. 2016;26(3):740-51. Epub 2016/07/15. doi: 10.1890/15-0934.  
595 PubMed PMID: 27411247.
- 596 22. Gura T. Citizen science: amateur experts. *Nature*. 2013;496(7444):259-61. Epub  
597 2013/04/16. doi: 10.1038/nj7444-259a. PubMed PMID: 23586092.
- 598 23. Gadermaier G, Dörler D, Heigl F, Mayr S, Rüdiger J, Brodschneider R, et al. Peer-  
599 reviewed publishing of results from Citizen Science projects. *Journal of Science*  
600 *Communication*. 2018;17(03). doi: 10.22323/2.17030101.
- 601 24. Posada-Céspedes S, Seifert D, Topolsky I, Jablonski KP, Metzner KJ, Beerenwinkel N.  
602 V-pipe: a computational pipeline for assessing viral genetic diversity from high-throughput data.  
603 *Bioinformatics*. 2021. Epub 2021/01/21. doi: 10.1093/bioinformatics/btab015. PubMed PMID:  
604 33471068; PubMed Central PMCID: PMCPMC8289377.
- 605 25. Madeira F, Park YM, Lee J, Buso N, Gur T, Madhusoodanan N, et al. The EMBL-EBI  
606 search and sequence analysis tools APIs in 2019. *Nucleic Acids Res*. 2019;47(W1):W636-W41.  
607 Epub 2019/04/13. doi: 10.1093/nar/gkz268. PubMed PMID: 30976793; PubMed Central  
608 PMCID: PMCPMC6602479.
- 609 26. Sievers F, Wilm A, Dineen D, Gibson TJ, Karplus K, Li W, et al. Fast, scalable  
610 generation of high-quality protein multiple sequence alignments using Clustal Omega. *Mol Syst*  
611 *Biol*. 2011;7:539. Epub 2011/10/13. doi: 10.1038/msb.2011.75. PubMed PMID: 21988835;  
612 PubMed Central PMCID: PMCPMC3261699.
- 613 27. Goujon M, McWilliam H, Li W, Valentin F, Squizzato S, Paern J, et al. A new  
614 bioinformatics analysis tools framework at EMBL-EBI. *Nucleic Acids Res*. 2010;38(Web Server  
615 issue):W695-9. Epub 2010/05/05. doi: 10.1093/nar/gkq313. PubMed PMID: 20439314.
- 616 28. Carlen EJ, Li R, Winchell KM. Urbanization predicts flight initiation distance in feral  
617 pigeons (*Columba livia*) across New York City. *Animal Behaviour*. 2021;178:229-45. doi:  
618 <https://doi.org/10.1016/j.anbehav.2021.06.021>.
- 619 29. Walcott C. Pigeon homing: observations, experiments and confusions. *J Exp Biol*.  
620 1996;199(Pt 1):21-7. Epub 1996/01/01. PubMed PMID: 9317262.
- 621 30. Peeters BP, de Leeuw OS, Koch G, Gielkens AL. Rescue of Newcastle disease virus  
622 from cloned cDNA: evidence that cleavability of the fusion protein is a major determinant for  
623 virulence. *J Virol*. 1999;73(6):5001-9. Epub 1999/05/11. doi: 10.1128/JVI.73.6.5001-5009.1999.  
624 PubMed PMID: 10233962; PubMed Central PMCID: PMCPMC112544.
- 625 31. Romer-Oberdorfer A, Mundt E, Mebatsion T, Buchholz UJ, Mettenleiter TC. Generation  
626 of recombinant lentogenic Newcastle disease virus from cDNA. *J Gen Virol*. 1999;80 ( Pt  
627 11):2987-95. Epub 1999/12/02. doi: 10.1099/0022-1317-80-11-2987. PubMed PMID: 10580061.
- 628 32. Zamarin D, Palese P. Oncolytic Newcastle disease virus for cancer therapy: old  
629 challenges and new directions. *Future Microbiol*. 2012;7(3):347-67. Epub 2012/03/08. doi:  
630 10.2217/fmb.12.4. PubMed PMID: 22393889; PubMed Central PMCID: PMCPMC4241685.
- 631 33. Vigil A, Martinez O, Chua MA, Garcia-Sastre A. Recombinant Newcastle disease virus  
632 as a vaccine vector for cancer therapy. *Mol Ther*. 2008;16(11):1883-90. Epub 2008/08/21. doi:  
633 10.1038/mt.2008.181. PubMed PMID: 18714310; PubMed Central PMCID: PMCPMC2878970.
- 634 34. Vijayakumar G, Palese P, Goff PH. Oncolytic Newcastle disease virus expressing a  
635 checkpoint inhibitor as a radioenhancing agent for murine melanoma. *EBioMedicine*.



636 2019;49:96-105. Epub 2019/11/05. doi: 10.1016/j.ebiom.2019.10.032. PubMed PMID:  
637 31676387; PubMed Central PMCID: PMC6945240.  
638 35. Ferreira HL, Suarez DL. Single-Nucleotide Polymorphism Analysis to Select Conserved  
639 Regions for an Improved Real-Time Reverse Transcription-PCR Test Specific for Newcastle  
640 Disease Virus. Avian Dis. 2019;63(4):625-33. Epub 2019/12/24. doi: 10.1637/aviandiseases-D-  
641 19-00071. PubMed PMID: 31865677.  
642

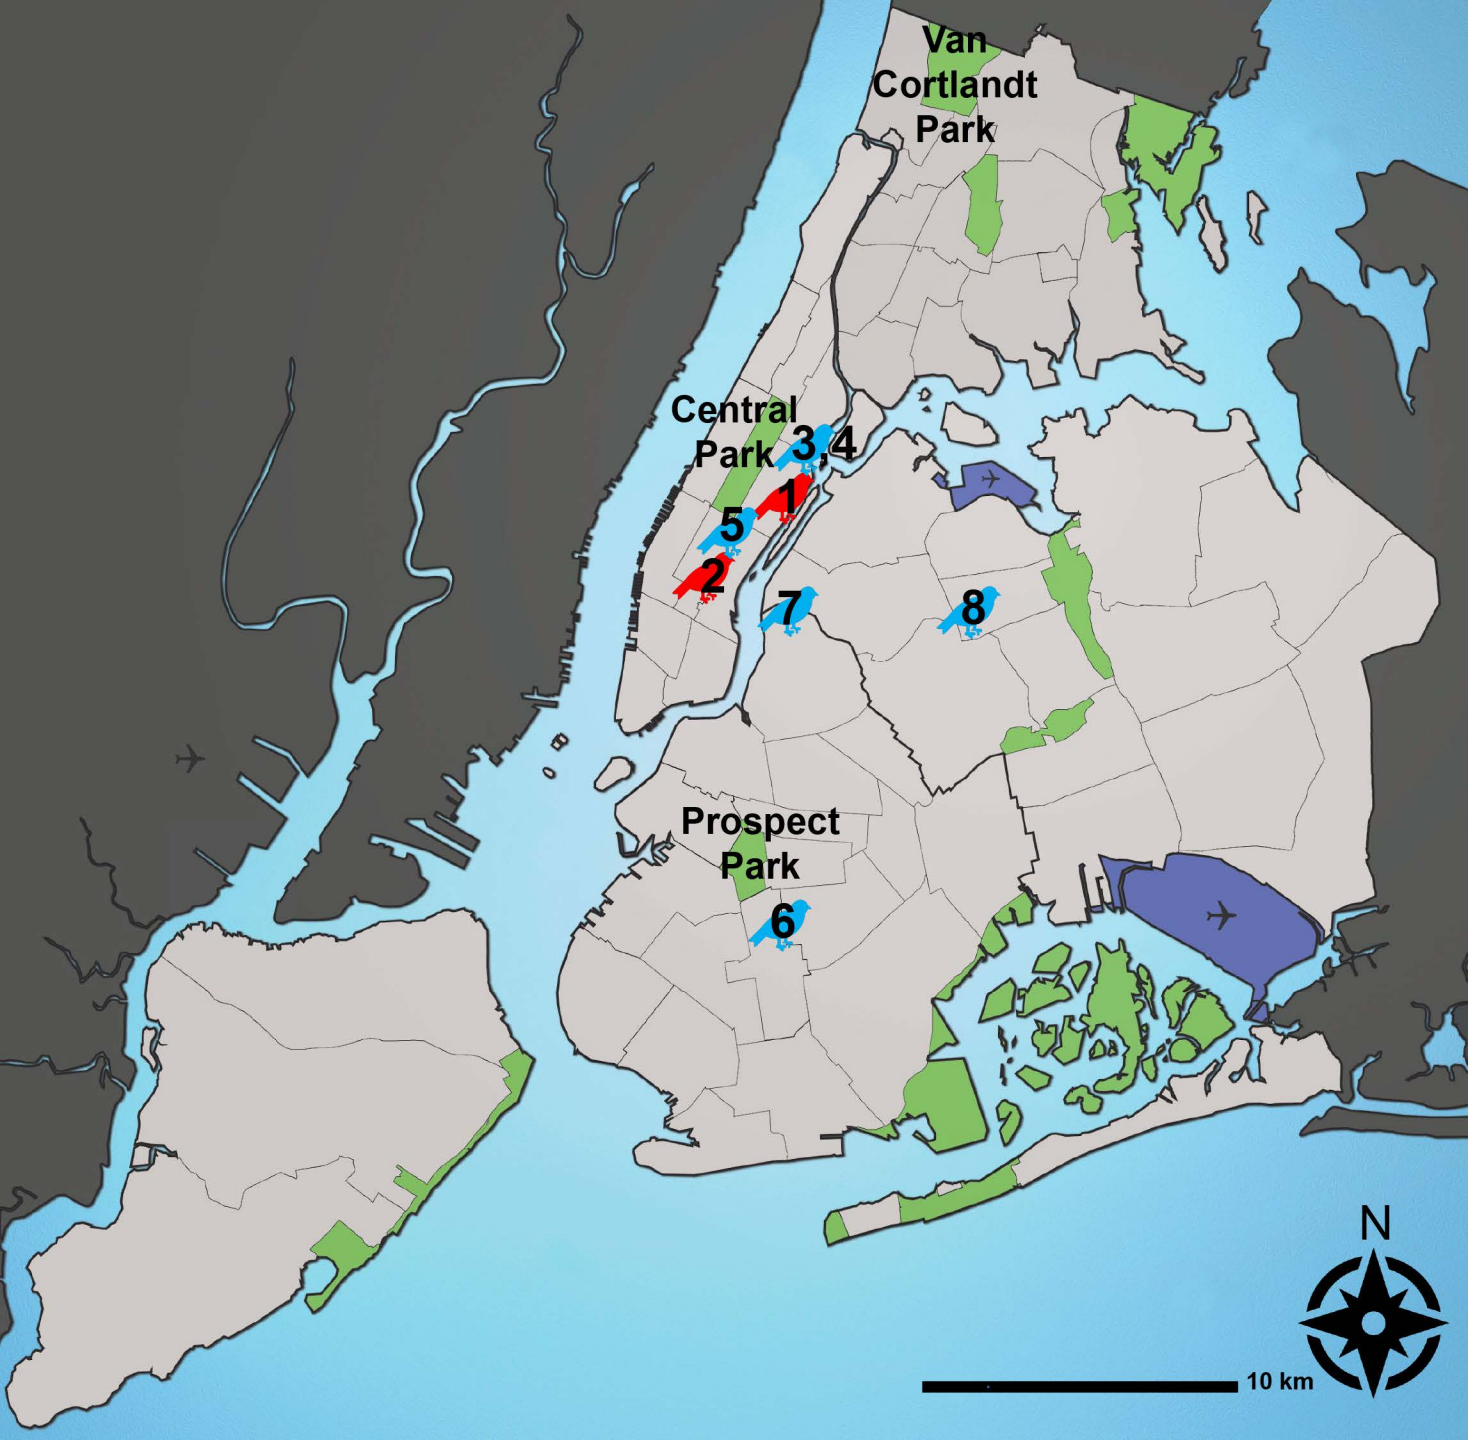

|          |                                                                                                    |     |
|----------|----------------------------------------------------------------------------------------------------|-----|
| 21-0109  | MGSKPSTWIPAPLMLITRITLVLVSCIHLTSSLDGRPLAAAGIVVTGEKVINIYTSSTQTS                                      | 60  |
| 21-0052  | MGSKPPTQTAPLMLITRATLVLVSCICLTSSLDGRPLAAAGIVVTGEKAINIYTSSTQTS                                       | 60  |
| KP780874 | MGSKPSTRIPAPLMLITRITLVLVSCICLTSSLDGRPLAAAGIVVTGEKVINIYTSSTQTS<br>***** * ***** * ***** * .*****    | 60  |
|          | F cleavage site                                                                                    |     |
| 21-0109  | IIVKLLPNMPKDKEACAKAPLEAYNRTLTTLLTPLGDSIRRIQGSVSTSGVRRKKRFIGA                                       | 120 |
| 21-0052  | IIVKLLPNMPKDKEACAKAPLEAYNRTLTTLLTPLGDSIRRIQGSVSTSGVRRKKRFIGA                                       | 120 |
| KP780874 | IIVKLLPNMPKDKEACAKAPLEAYNRTLTTLLTPLGDSIRRIQGSVSTSGVRRKKRFIGA<br>*****                              | 120 |
| 21-0109  | IIGSVALGVATSAQITAAAALI QANQNAANILRLKESIAATNEAVHEVTDGLSQLAVAVG                                      | 180 |
| 21-0052  | IIGSVALGVATSAQITAAAALI QANQNAANILRLKESIAATNEAVHEVTDGLSQLAVAVG                                      | 180 |
| KP780874 | IIGSVALGVATSAQITAAAALI QANQNAANILRLKESIAATNEAVHEVTDGLSQLAVAVG<br>*****                             | 180 |
| 21-0109  | KMQQFVNDQFNNTARELDCIKIAQQVGVELNLYLTELTTVFGPQITSPALTQLTIQALYN                                       | 240 |
| 21-0052  | KMQQFVNDQFNNTARELDCIKIAQQVGVELNLYLTELTTVFGPQITSPALTQLTIQALYN                                       | 240 |
| KP780874 | KMQQFVNDQFNNTARELDCIKIAQQVGVELNLYLTELTTVFGPQITSPALTQLTIQALYN<br>*****                              | 240 |
| 21-0109  | LAGGNMDYLLTKLGIGNNHLSLIGSGLITGNPILYDSQTQILGIQVNLPSVGNLNNMRA                                        | 300 |
| 21-0052  | LAGGNMDYLLTKLGIGNNHLSLIGSGLITGNPILYDSQTQILGIQVNLPSVGNLNNMRA                                        | 300 |
| KP780874 | LAGGNMDYLLTKLGIGNSHLSSLIGSGLITGNPILYDSQTQILGIQVNLPSVGNLNNMRA<br>***** .*****                       | 300 |
| 21-0109  | TYLETLSVSTTKGFASALVPKVVTVQVGSVIEELDTSYCIESDLDLYCTRIVTLPMSPGIY                                      | 360 |
| 21-0052  | TYLETLSVSTTKGFASALVPKVVTVQVGSVIEELDTSYCIESDLDLYCTRIVTLPMSPGIY                                      | 360 |
| KP780874 | TYLETLSVSTTKGFASALVPKVVTVQVGSVIEELDTSYCIESDLDLYCTRIVTLPMSPGIY<br>***** :*****                      | 360 |
| 21-0109  | SCINSGNTSACMYSKTEGALNTPYMALKGSVIANCKITTCRCADPPGIISQNYGEAVSLID                                      | 420 |
| 21-0052  | SCLSGNTSACMYSKTEGALNTPYMALKGSVIANCKITTCRCADPPGIISQNYGEAVSLID                                       | 420 |
| KP780874 | SCLSGNTSACMYSKTEGALNTPYMALKGSVIANCKITTCRCADPPGIISQNYGEAVSLID<br>*** .*****                         | 420 |
| 21-0109  | RHSCNVLSLDGITLRLSGEFDATYQKNISILDSQVIVTGNLDISTELGSVNNSSISNALDR                                      | 480 |
| 21-0052  | RHSCNVLSLDGITLRLSGEFDATYQKNISILDSQVIVTGNLDISTELGSVNNSSISNALDR                                      | 480 |
| KP780874 | RHSCNVLSLDGITLRLSGEFDATYQKNISILDSQVIVTGNLDISTELGSVNNSSISNALDR<br>***** .***** .*****               | 480 |
| 21-0109  | LAESDSKINQVNVKLTSTLSALITYIVLTVMSLALGTLSSLVLSCYLMYKQKAQQKTLWLWG                                     | 540 |
| 21-0052  | LAESNSKIDKVNKLTSTLSALITYIVLTVVSLVFGTLSSLVLSCYLMYKQKAQQKTLWLWG                                      | 540 |
| KP780874 | LAESNSKLDKVNKLTSTLSALITYIILTVMSLVFGTLSSLVLSCYLMYKQKAQQKTLWLWG<br>*** :*** : :***** :*** :** .***** | 540 |
| 21-0109  | NNTLDQMRATTKT                                                                                      | 553 |
| 21-0052  | NNTLDQMRATTRT                                                                                      | 553 |
| KP780874 | NNTLDQMRATTRT<br>***** :*                                                                          | 553 |

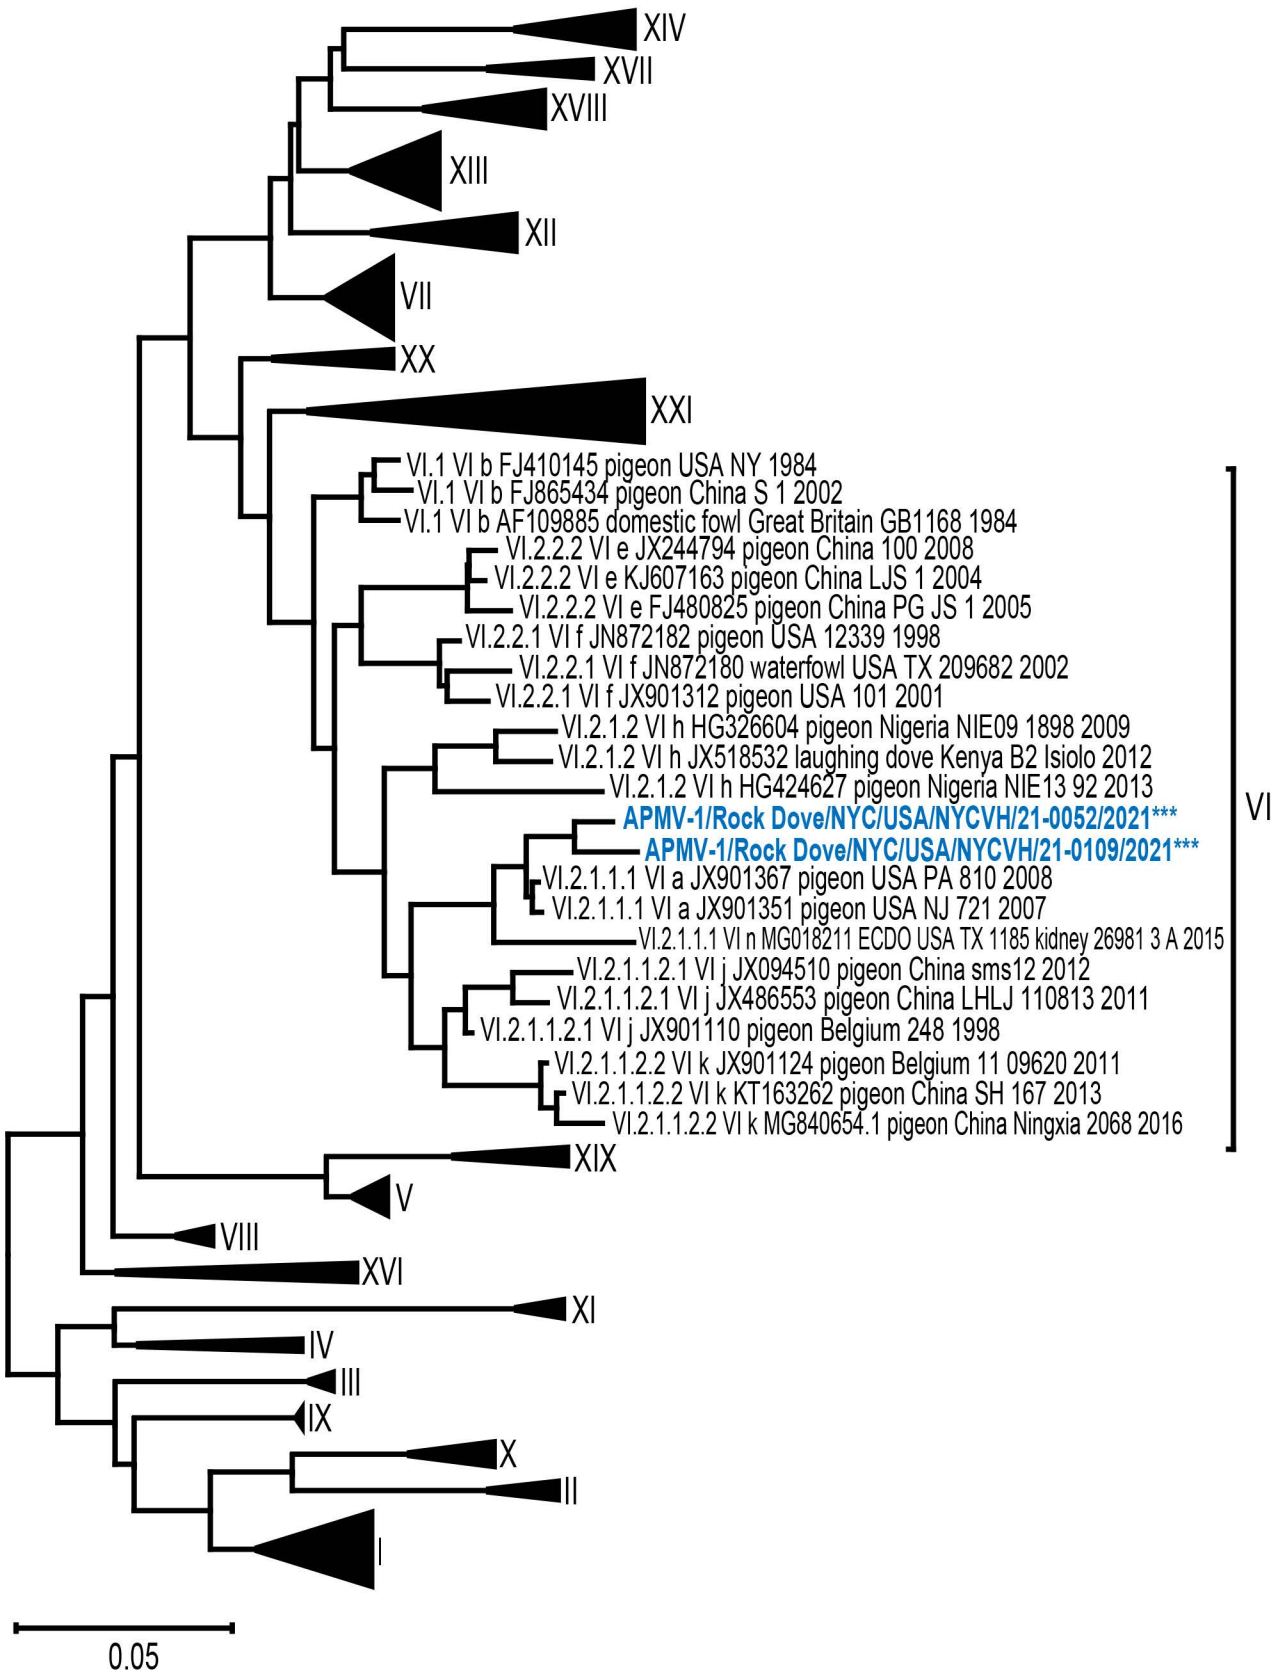



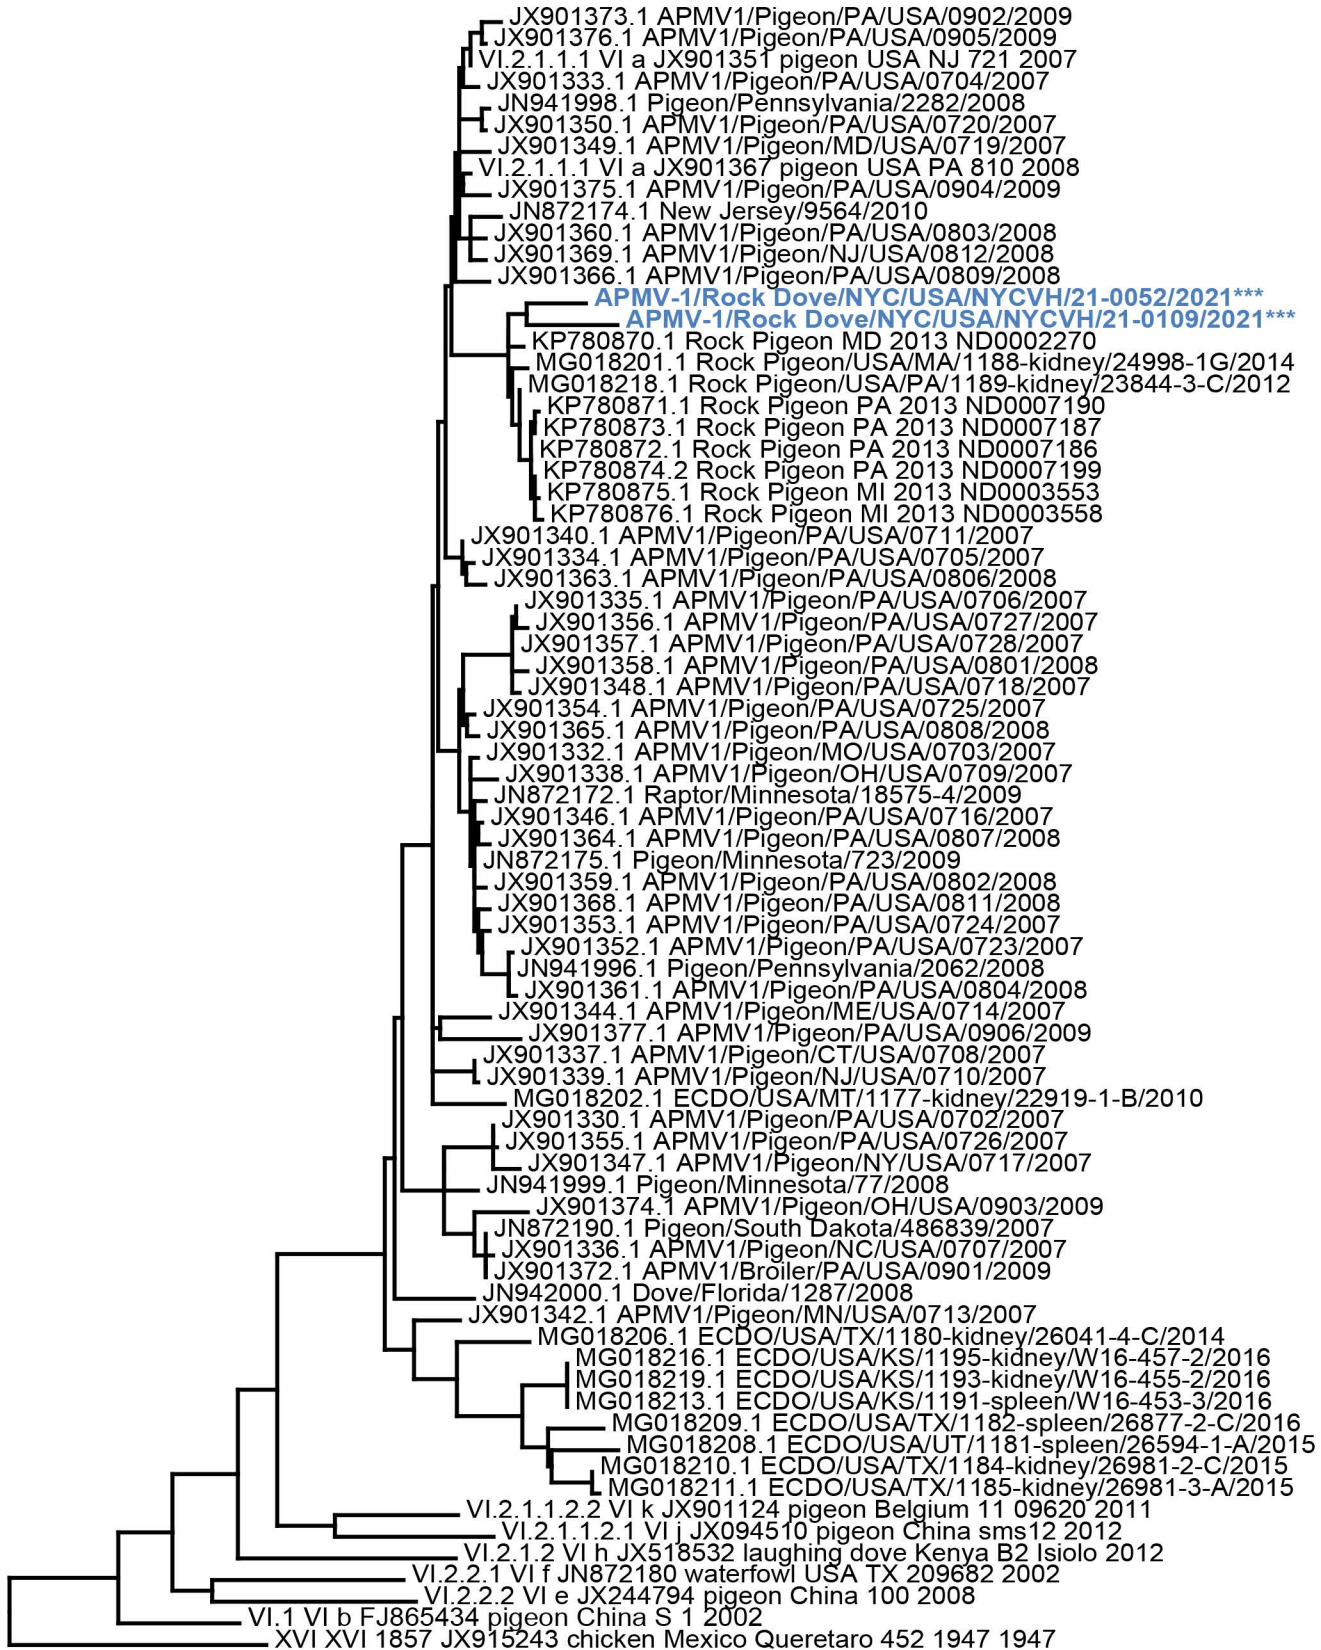

0.01
